# Supplementary material
Source: Springer Nature journal article supplement (https://www.springermedizin.de/resource/supplementary/12913_2013_3143_MOESM4_ESM.pdf/9532494)

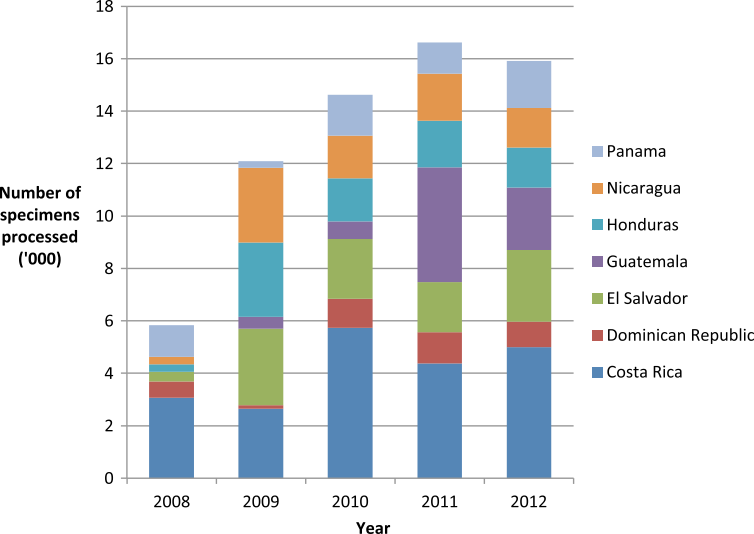

Supplement: MOESM4 [file 9532494]
